# Supplementary material
Source: publisher site journal article supplement (https://cdn.jamanetwork.com/ama/content_public/journal/cardiology/935739/hoi160046supp1_prod.pdf)
Supplement: Supplementary file 1 [file hoi160046supp1_prod.pdf]

## Supplementary Online Content

White J, Swerdlow DL, Preiss D, et al. Association of lipid fractions with risks for coronary artery disease and diabetes. *JAMA Cardiol*. Published online August 3, 2016. doi:10.1001/jamacardio.2016.1884.

**eFigure 1.** LDL-C and CAD

**eFigure 2.** LDL-C and T2D

**eFigure 3.** HDL-C and CAD

**eFigure 4.** HDL-C and T2D

**eFigure 5.** TG and CAD

**eFigure 6.** TG and T2D

**eTable 1.** The Correlation and (*P* Value) for an Association Test Between the Instrumental Variable Estimates and Exposure Estimates for the SNPs in the Chosen Instruments

**eTable 2.** Magnitude of Associations That the Mendelian Randomization Analyses Had Sufficient Power (80%) to Detect (at a Bonferroni-Adjusted Alpha of 0.05/6)

This supplementary material has been provided by the authors to give readers additional information about their work.

**eFigure 1. LDL-C and CAD:**

(A) plot to show proportion of variance of LDL-C explained, presence of directional pleiotropy and estimates derived from the three MR approaches; (B) scatter plot of LDL-C and CAD associations for SNPs and superimposed MR estimates

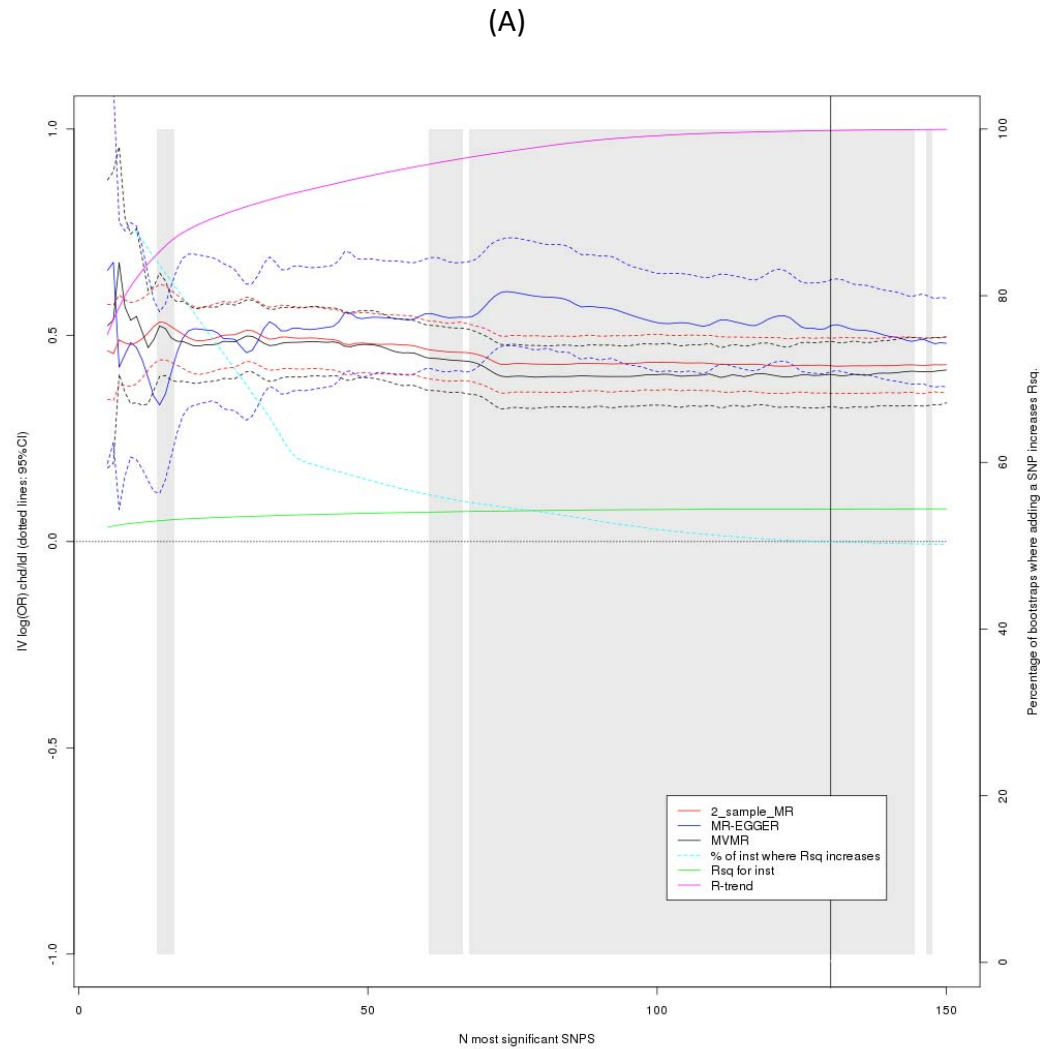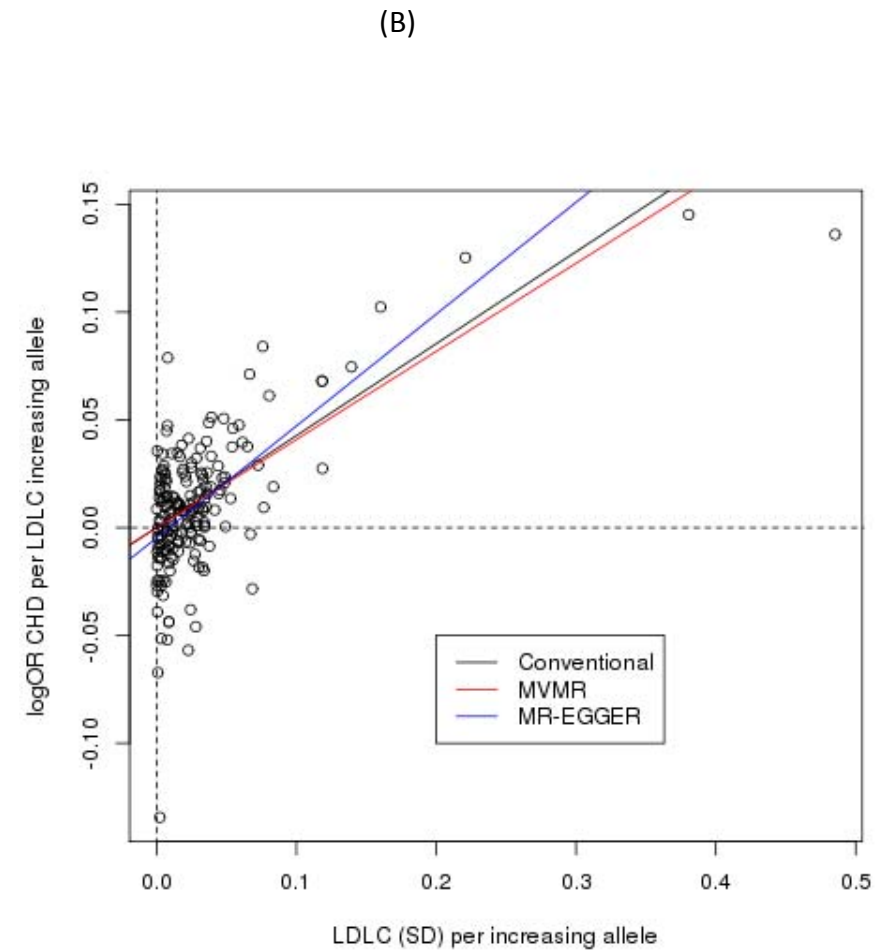

## Orientation for eFigures 1 to 6

### Panel A:

X-axis = SNPs contributing towards the genetic instrument, ordered by  $R^2$  with lipid trait (highest first). Y-axis = Mendelian randomization estimate for disease (log odds scale).

*Instrument properties: (a) proportion of variance of exposure*

Green line:  $R^2$  of the instrument

Purple line: R-trend = the ratio of  $R^2$  for current instrument compared to  $R^2$  for an instrument comprising 30 more SNPs; the beginning of the asymptotic phase marks where the instrument accounts for maximal variation in the trait while minimizing over-specification.

Turquoise dotted line: percentage of bootstraps where the current instrument has a higher  $R^2$  with the exposure than the previous instrument.

Vertical black line: the position where the number of SNPs optimally explains variation in the trait (chosen for Mendelian randomization), selected based on (i) R-trend (purple line) and (ii) gain in  $R^2$  compared to previous instrument (turquoise line)

*Instrument properties: (b) directional pleiotropy of genetic instrument*

Grey-shading = presence of pleiotropy, based on the intercept derived from MR-Egger. When directional pleiotropy is present, the most reliable estimate is derived from MR-Egger as conventional (2-sample) MR does not take into account directional pleiotropy and MVMR may not sufficiently remove the directional nature of the pleiotropy.

*Mendelian randomization estimates:* Solid lines and corresponding dotted lines represent point estimate and Bonferroni-adjusted 95%CI for the estimate derived from MR.

Red line: conventional (2-sample) MR;

Blue line: MR-Egger;

Black: multivariate MR (MVMR).

**eFigure 2. LDL-C and T2D**

(A) plot to show proportion of variance of LDL-C explained, presence of directional pleiotropy and estimates derived from the three MR approaches; (B) Scatter plot of LDL-C and T2D associations for SNPs and super-imposed MR estimates  
Figure legend as for eFigure 1.

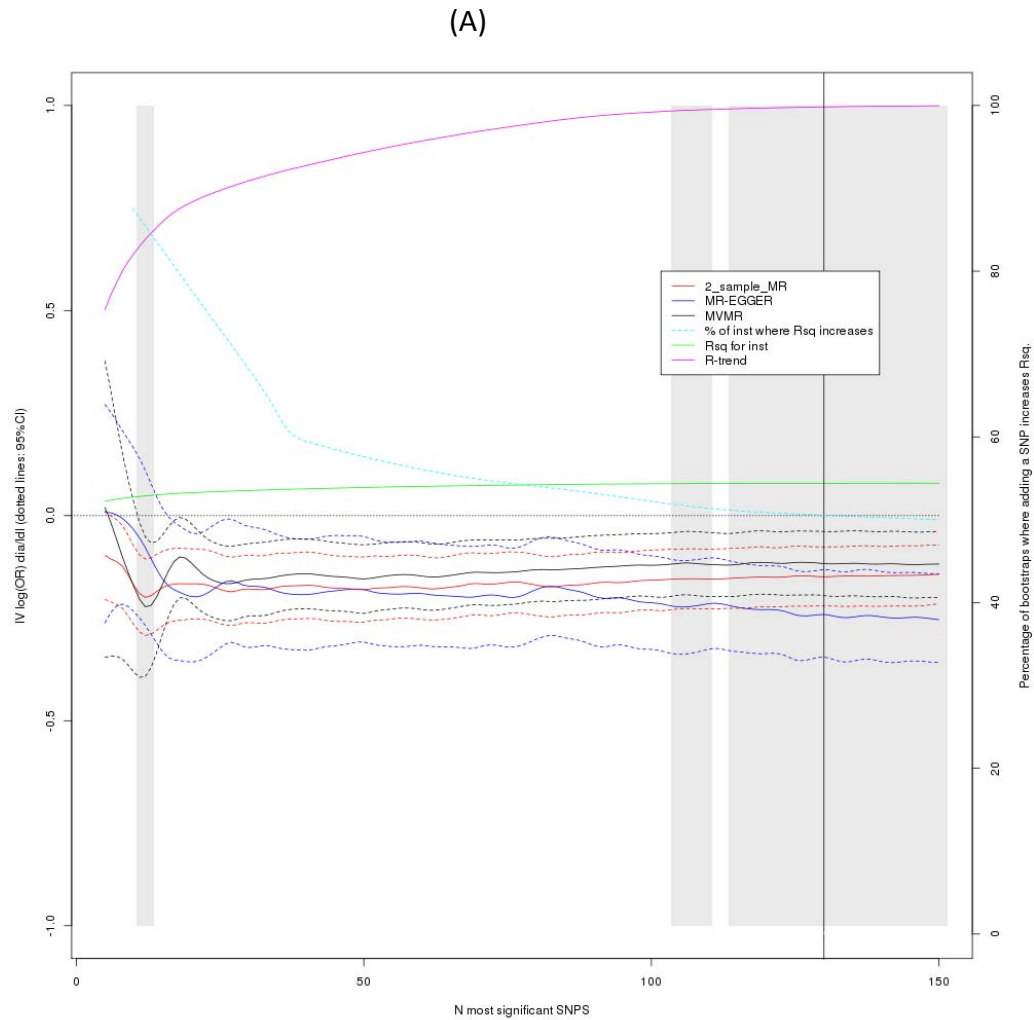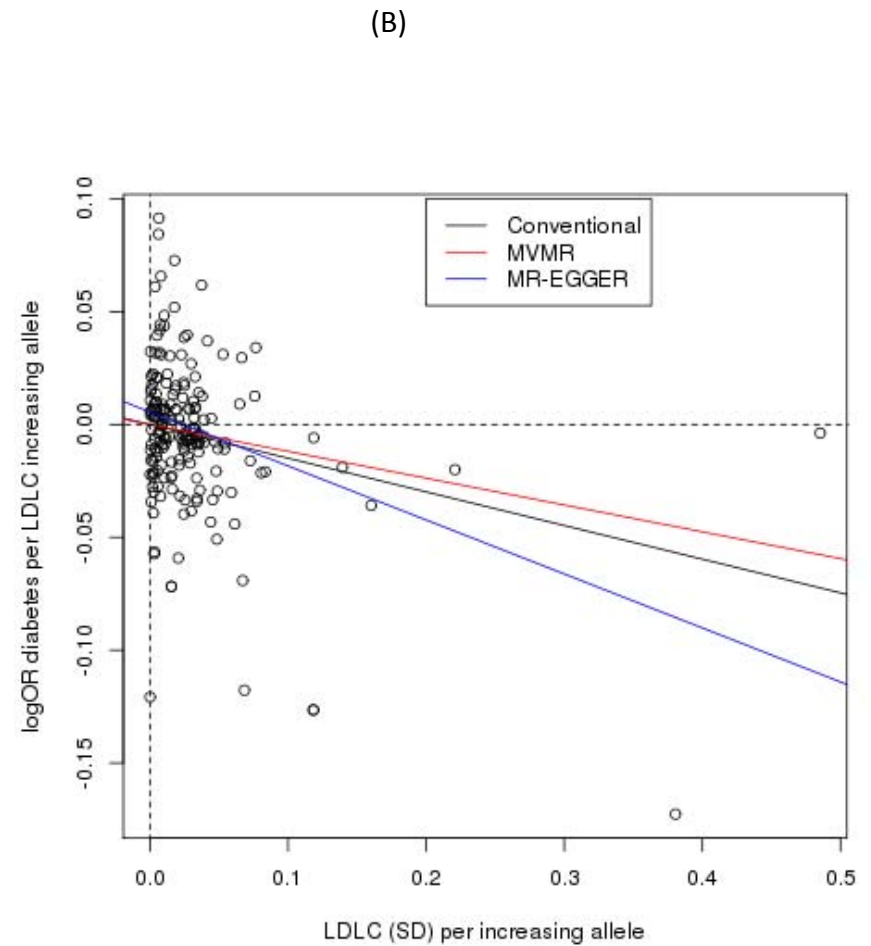

**eFigure 3. HDL-C and CAD**

(A) plot to show proportion of variance of HDL-C explained, presence of directional pleiotropy and estimates derived from the three MR approaches; (B) Scatter plot of HDL-C and CAD associations for SNPs and super-imposed MR estimates  
Figure legend as for eFigure 1.

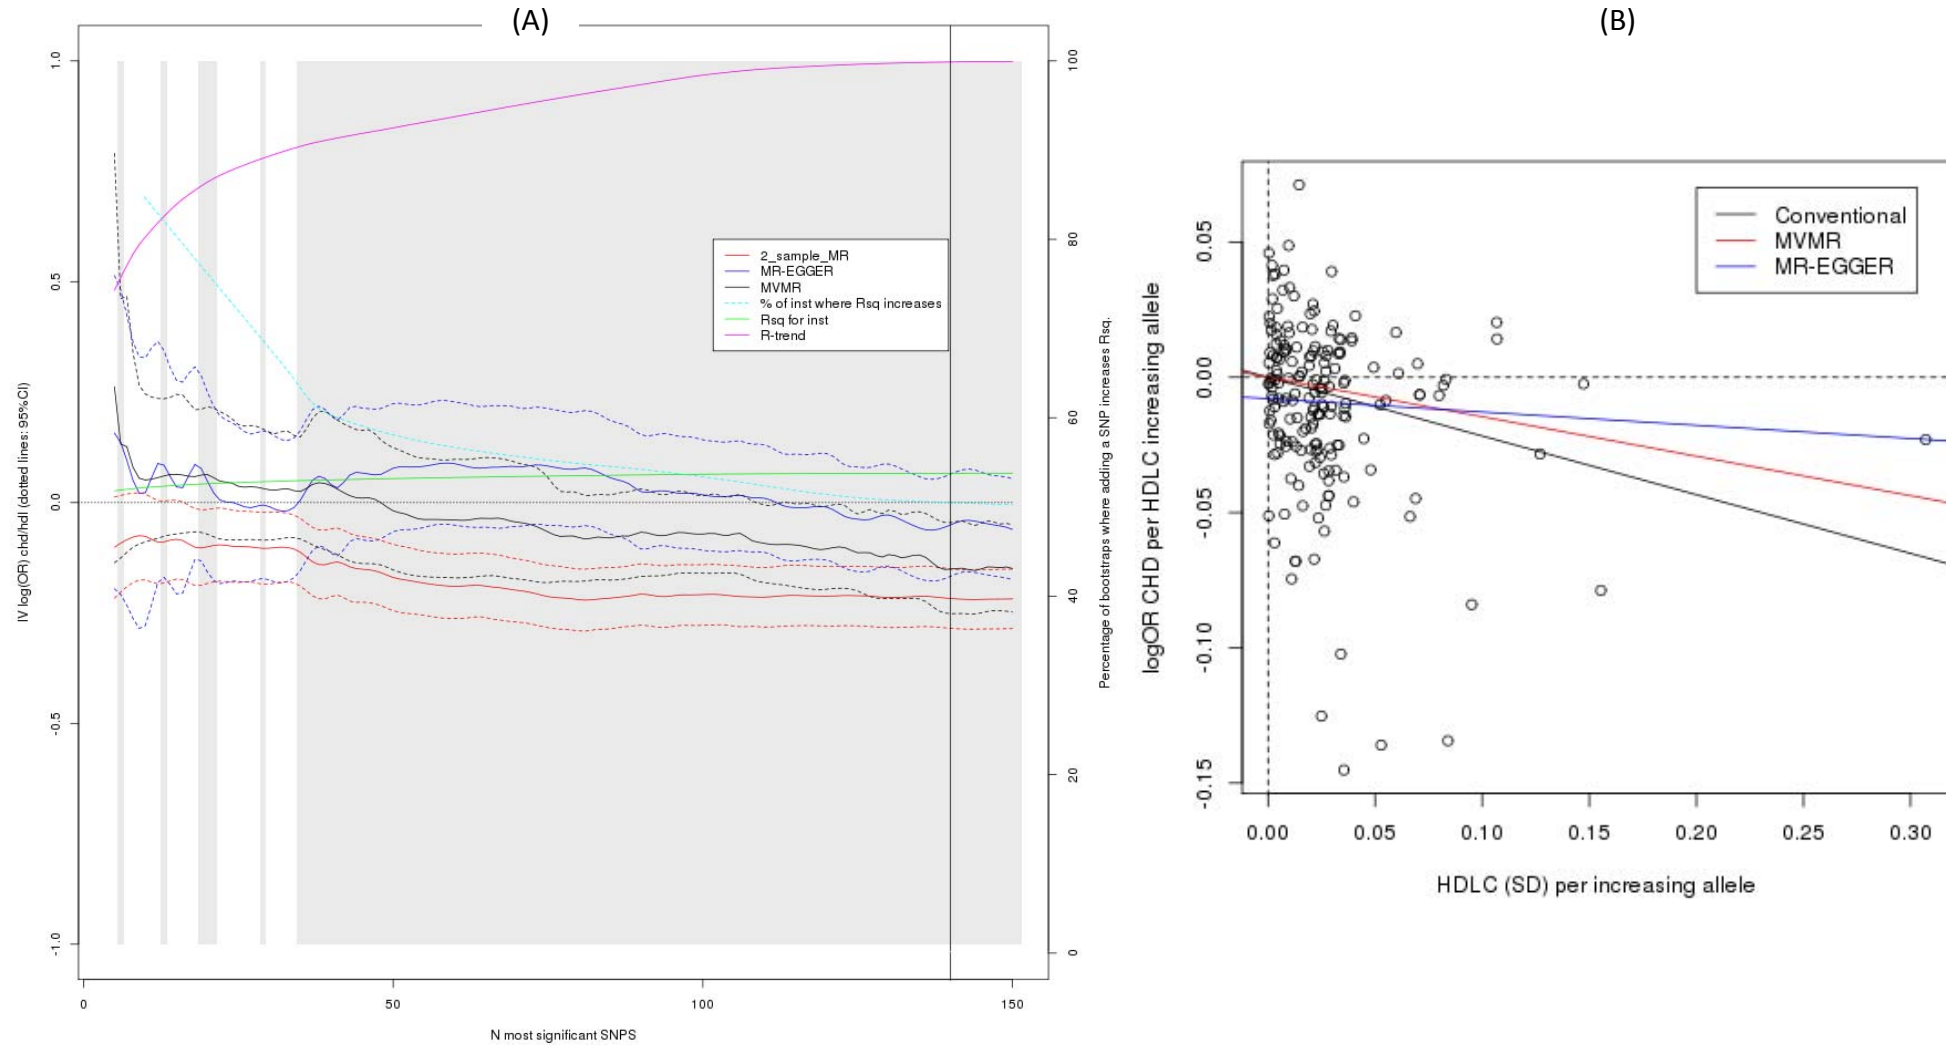

**eFigure 4. HDL-C and T2D**

(A) plot to show proportion of variance of HDL-C explained, presence of directional pleiotropy and estimates derived from the three MR approaches; (B) Scatter plot of HDL-C and T2D associations for SNPs and super-imposed MR estimates  
Figure legend as for eFigure 1.

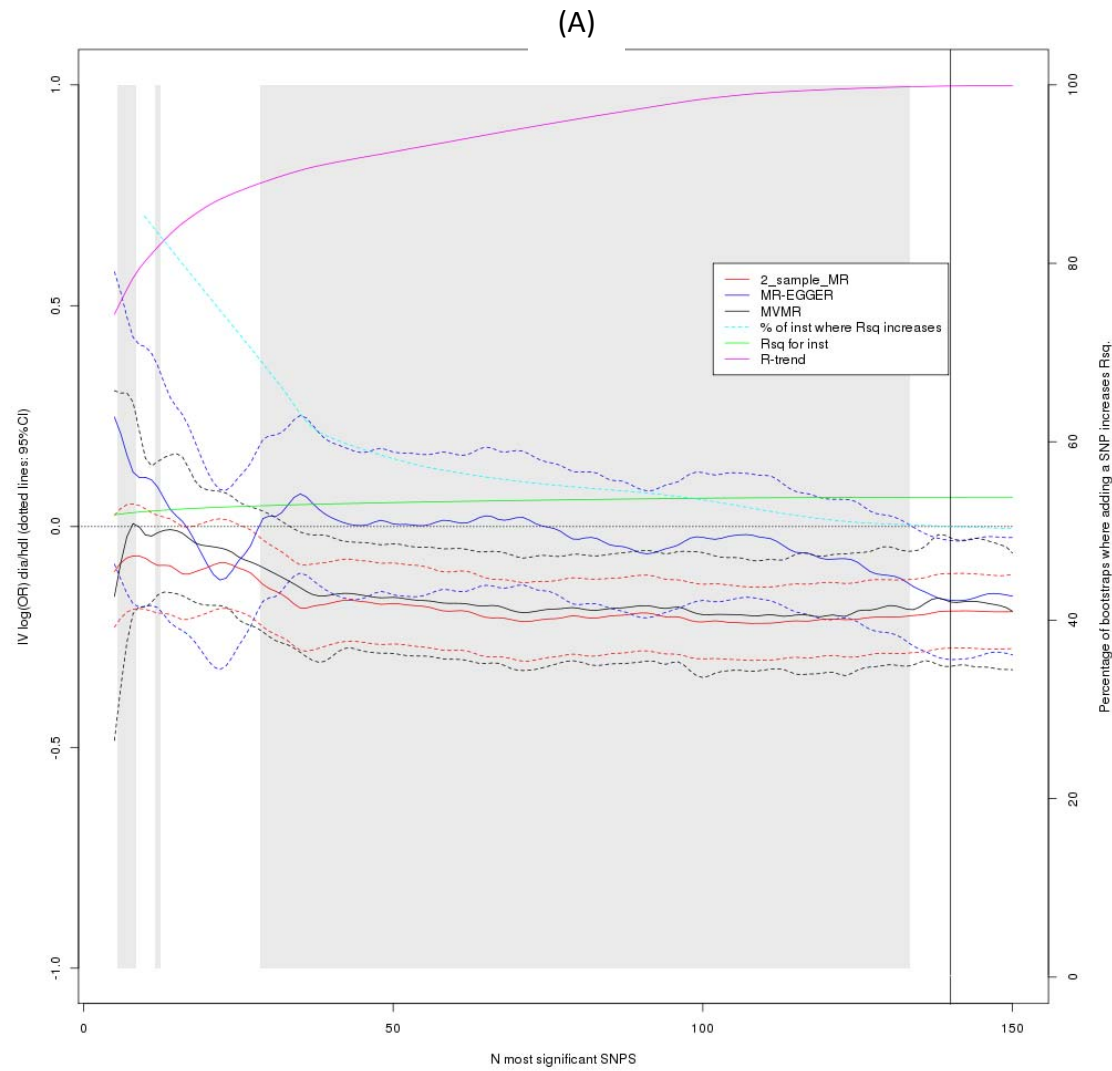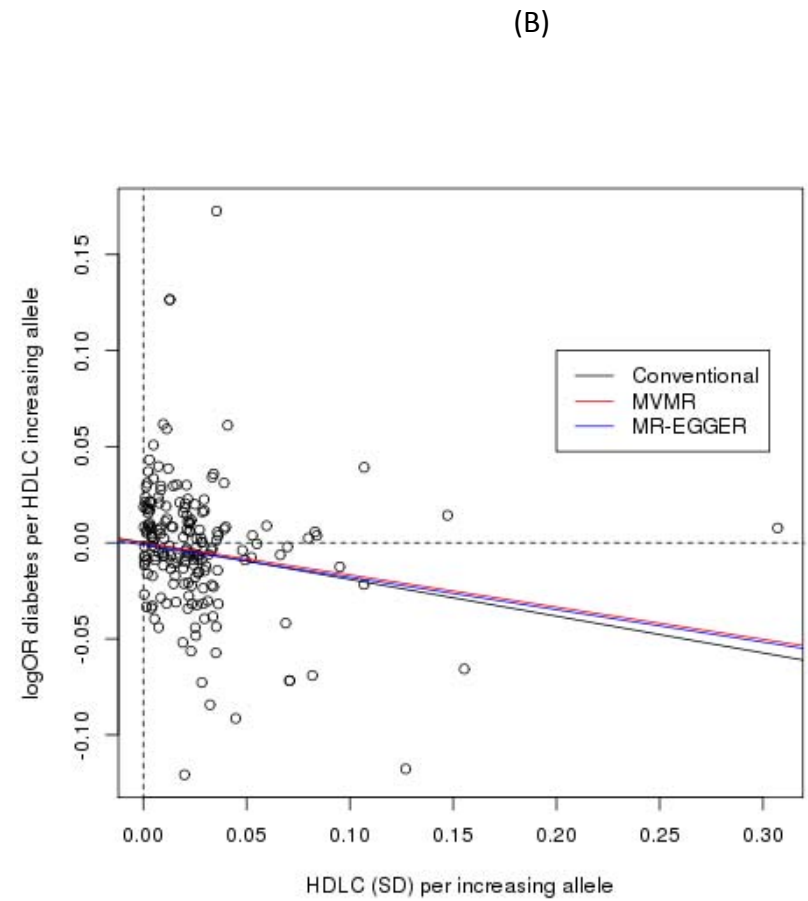

**eFigure 5. TG and CAD**

(A) plot to show proportion of variance of TG explained, presence of directional pleiotropy and estimates derived from the three MR approaches; (B) Scatter plot of TG and CAD associations for SNPs and super-imposed MR estimates

Figure legend as for eFigure 1.

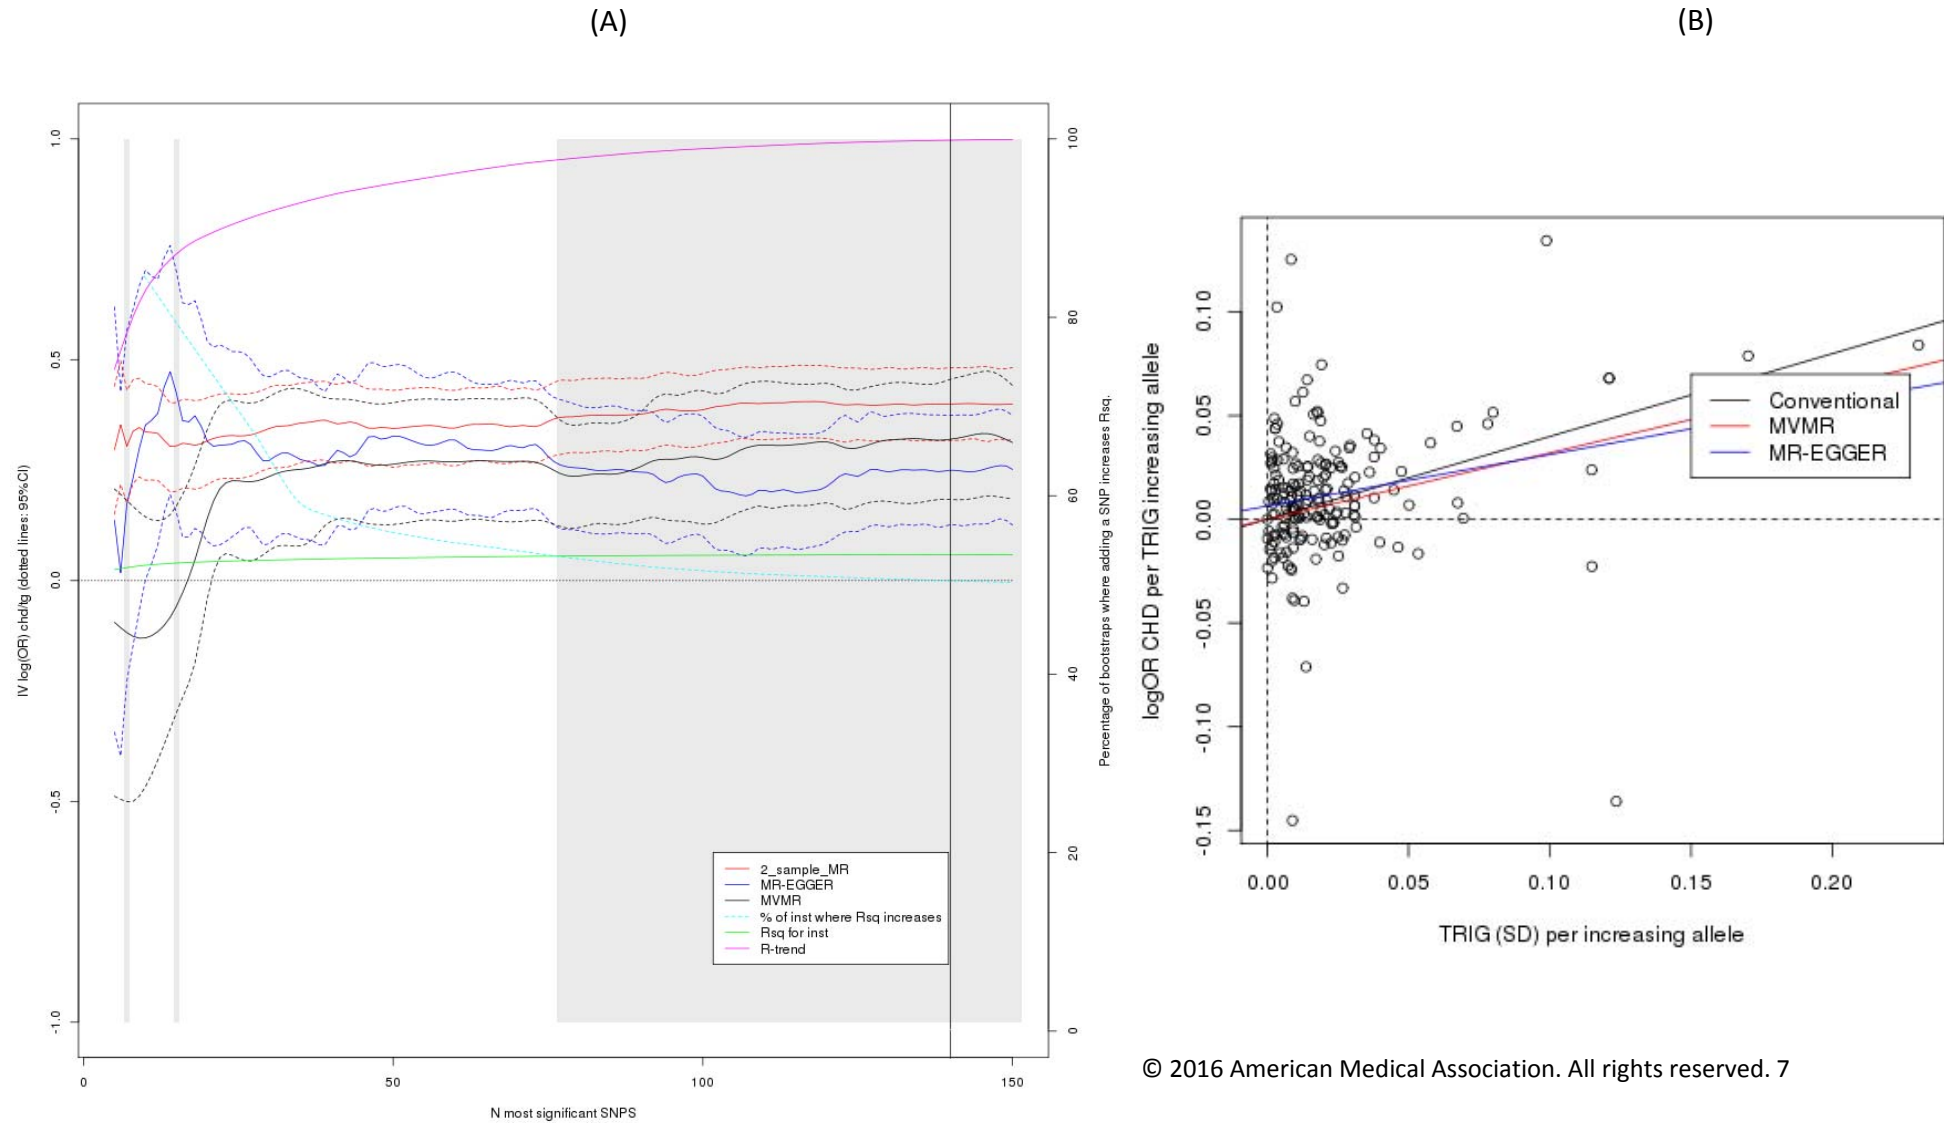

**eFigure 6. TG and T2D**

(A) plot to show proportion of variance of TG explained, presence of directional pleiotropy and estimates derived from the three MR approaches; (B) Scatter plot of TG and T2D associations for SNPs and super-imposed MR estimates  
 Figure legend as for eFigure 1.

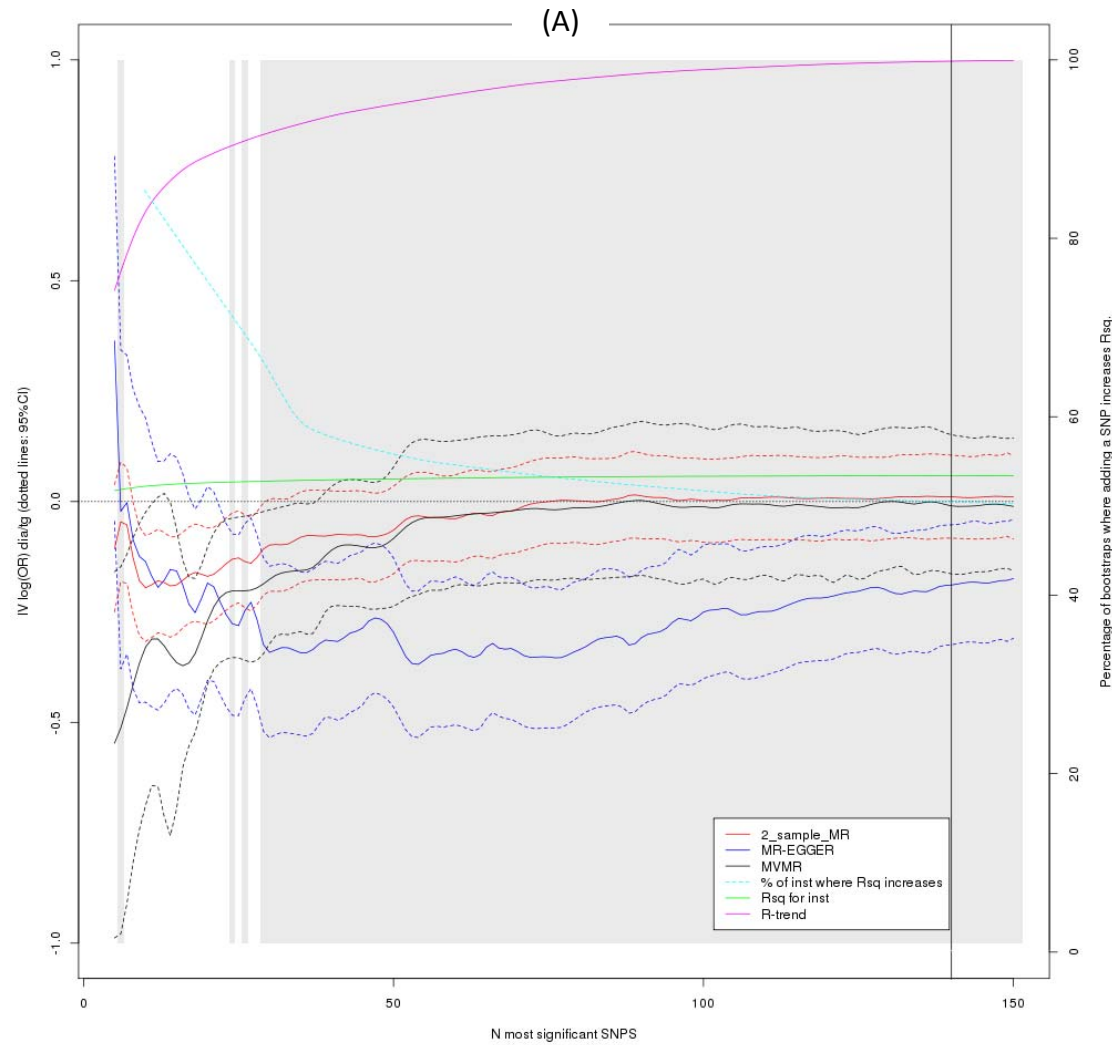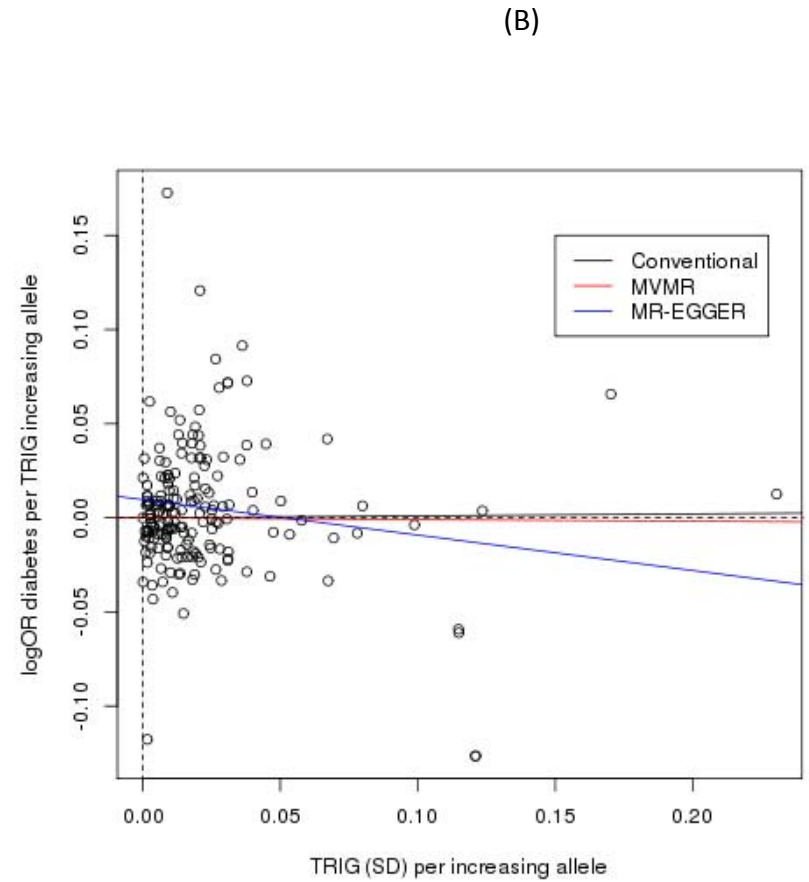



**eTable 1.** The Correlation and (*P* Value) for an Association Test Between the Instrumental Variable Estimates and Exposure Estimates for the SNPs in the Chosen Instruments

| <b>Trait, #SNPs</b> | <b>CAD</b>    | <b>T2D</b>     |
|---------------------|---------------|----------------|
| LDL-C , 130 SNPs    | 0.081 (0.274) | -0.091 (0.301) |
| HDL-C, 140 SNPs     | 0.013 (0.859) | -0.038 (0.659) |
| TG, 140 SNPs        | 0.019 (0.794) | -0.115 (0.179) |

Legend: A small P-value may indicate violation of the 'InSIDE rule'.

**eTable 2.** Magnitude of Associations That the Mendelian Randomization Analyses Had Sufficient Power (80%) to Detect (at a Bonferroni-Adjusted Alpha of 0.05/6)

| Lipid | True effect (OR) which the experiment has 80% power to detect |       |
|-------|---------------------------------------------------------------|-------|
|       | CAD                                                           | T2D   |
| LDL-C | 1.056                                                         | 0.923 |
| HDL-C | 0.945                                                         | 0.926 |
| TG    | 1.064                                                         | 0.916 |

Legend: Values represent odds ratios for the association of a 1-SD genetically instrumented increase in LDL-C, HDL-C and TG and risk of CAD and T2D.
